# Supplementary material for: A quantitative approach to evaluating the GWP timescale through implicit discount rates
Source: Copernicus journal article supplement (doi:10.5194/esd-9-1013-2018), 2018-08-17
Supplement: Supplementary file [file esd-9-1013-2018-supplement-title-page.pdf › esd-9-1013-2018-supplement-title-page.pdf]

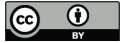

## *Supplement of*

# **A quantitative approach to evaluating the GWP timescale through implicit discount rates**

**Marcus C. Sarofim and Michael R. Giordano**

*Correspondence to:* Marcus C. Sarofim ([sarofim.marcus@epa.gov](mailto:sarofim.marcus@epa.gov))

- esd-9-1013-2018-supplement-title-page.pdf
- MetricsPaperCode
  - .Rhistory
  - .Rproj.user
    - \* D0FDAD79
    - \* shared
  - CentralParameters.R
  - FullSensitivityESD.R
  - GWPTimescaleCalc.R
  - MetricsSensitivityProject.Rproj
  - README for Metrics Paper Code.docx
  - data
    - \* gdpovertime.csv
    - \* rcp3PDgasconcs.csv
    - \* rcp45gasconcs.csv
    - \* rcp6gasconcs.csv
    - \* rcp85gasconcs.csv
  - nonCO2ESD.R
  - results
    - \* CH4GWP.pdf
    - \* CH4damageratio.pdf
    - \* Figure1.gridplot.pdf
    - \* GWPquantESD.csv
    - \* N2OGWP.pdf
    - \* N2Odamageratio.pdf
    - \* discountquantESD.csv

- \* doubleaxis.pdf
  - \* fig2dummy.pdf
  - \* n2ogridplot.pdf
- src
  - \* metricsfunctions.R
- Sarofim\_Metrics\_ESD\_SI\_6\_1\_18\_clean.pdf

The copyright of individual parts of the supplement might differ from the CC BY 4.0 License.
